# Supplementary material for: Adaptation of CD4 in gorillas and chimpanzees conveyed resistance to simian immunodeficiency viruses
Source: eLife journal article supplement (doi:10.7554/elife.93316), 2024-01-10
Supplement: fig5-data2 [file elife-93316-fig5-data2-v1.zip]

NOTE: the raw images are inverted (left to right) compared to the final figure

10 9 8 7 6 5 4 3 2 1

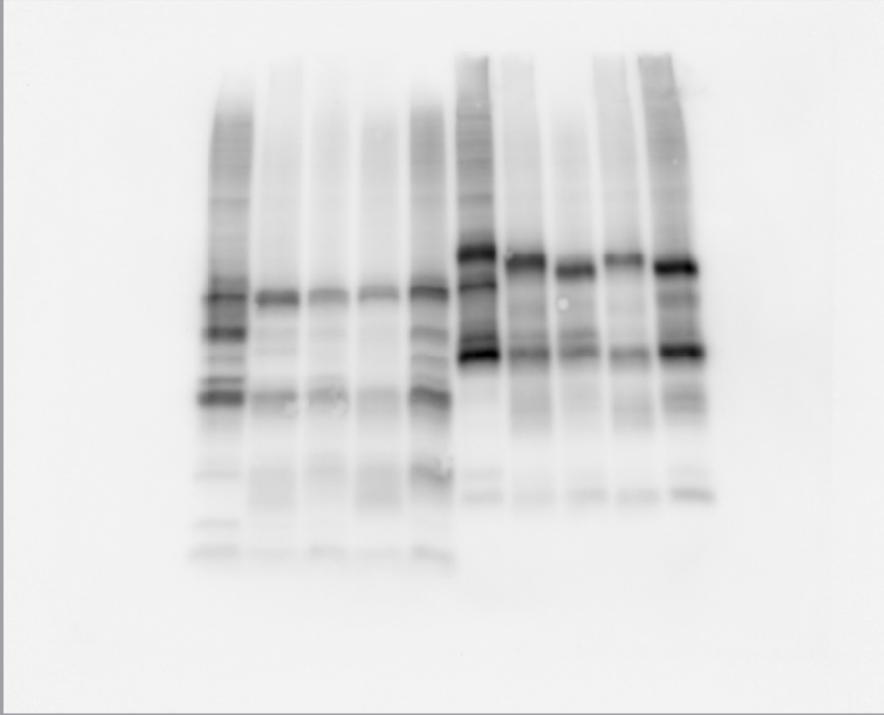

1. no PNG, Human wt
2. no PNG, hum T15N
3. no PNG, gor 2
4. no PNG, gor 3
5. Chimp
6. Human wt
7. hum T15N
8. gor 2
9. gor 3
10. Chimp

Blotted with anti-CD4 antibody

10 9 8 7 6 5 4 3 2 1

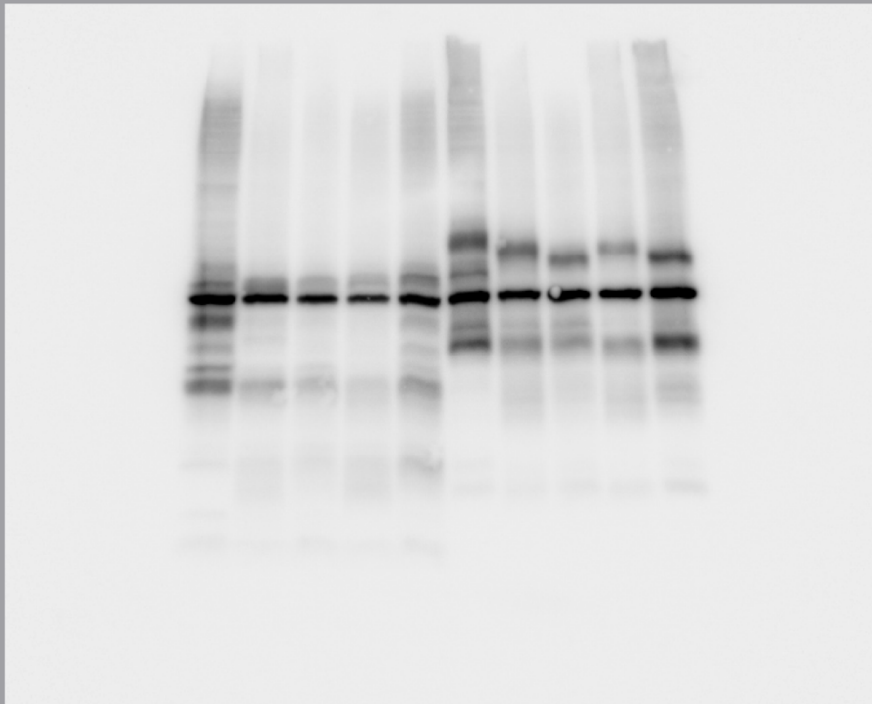

Blotted with anti-bActin antibody, using the same blot stained with anti CD4 antibody
