# Supplementary material for: Adaptation of CD4 in gorillas and chimpanzees conveyed resistance to simian immunodeficiency viruses
Source: eLife. 2025 May 14;13:RP93316. doi: 10.7554/eLife.93316 (PMC12077880; doi:10.7554/eLife.93316)
Supplement: Figure 2—source data 1. [file elife-93316-fig2-data1.xlsx]

## Sheet: Sheet1
	envelope	replicate	Human	Hominid	Hominin	Chimpanzee	Gorilla	Vector
	MB897	1	3560000	2390000	2570000	255000	725000	15000
		2	1910000	1710000	1680000	103000	418000	15000
		3	3180000	2330000	2180000	165000	968000	15000
	EK505	1	3080000	2270000	2190000	777000	502000	15000
		2	1620000	1470000	1340000	313000	258000	15000
		3	2610000	1850000	1730000	461000	628000	15000
	MT145	1	1140000	1080000	1100000	543000	97800	15000
		2	907000	924000	907000	481000	56800	15000
		3	925000	1140000	1080000	505000	84300	15000
	TAN1.910	1	523000	653000	598000	31900	211000	15000
		2	409000	486000	416000	33000	133000	15000
		3	443000	665000	614000	25500	207000	15000
	TAN2.69	1	673000	805000	749000	373000	604000	15000
		2	449000	621000	558000	288000	420000	15000
		3	519000	788000	770000	373000	656000	15000
	BG505	1	1980000	1570000	1630000	712000	425000	15000
		2	1180000	1150000	1140000	400000	274000	15000
		3	1440000	1090000	1100000	497000	409000	15000
	CH040	1	1930000	1500000	1540000	1310000	1100000	15000
		2	1490000	1180000	1250000	1030000	785000	15000
		3	1550000	1410000	1320000	1080000	920000	15000
	CAP210	1	2100000	1470000	1610000	16500	159000	15000
		2	1430000	1090000	1140000	15000	102000	15000
		3	1590000	1210000	1310000	15000	137000	15000
	QB587	1	1900000	798000	940000	222000	68500	15000
		2	1580000	712000	809000	227000	60800	15000
		3	1730000	881000	924000	249000	82000	15000
	YBF106	1	3090000	2290000	2410000	124000	241000	15000
		2	2740000	2010000	2080000	70500	161000	15000
		3	2200000	1830000	1990000	74000	174000	15000
