# Supplementary material for: Adaptation of CD4 in gorillas and chimpanzees conveyed resistance to simian immunodeficiency viruses
Source: eLife. 2025 May 14;13:RP93316. doi: 10.7554/eLife.93316 (PMC12077880; doi:10.7554/eLife.93316)
Supplement: Figure 4—figure supplement 1—source data 1. [file elife-93316-fig4-figsupp1-data1.xlsx]

## Sheet: Sheet1
			Gorilla aleles
envelope	replicate	Human	1	2	3	4	5	6	7	8
MB897	1	3560000	15000	15000	15000	15000	725000	957000	181000	428000
	2	1910000	15000	15000	15000	15000	418000	529000	56600	297000
	3	3180000	48000	15000	15000	15000	968000	1070000	58500	312000
EK505	1	3080000	29300	1290000	1110000	2380000	502000	662000	40500	101000
	2	1620000	18800	885000	785000	1310000	258000	353000	15000	72300
	3	2610000	65000	1140000	1160000	1390000	628000	646000	15800	73900
MT145	1	1140000	72000	576000	404000	549000	97800	116000	28500	81800
	2	907000	43100	337000	318000	437000	56800	97800	15800	60000
	3	925000	63800	467000	415000	468000	84300	95500	15000	45000
TAN1.910	1	523000	27800	282000	78400	141000	211000	270000	40900	141000
	2	409000	21800	190000	62300	89500	133000	188000	37500	118000
	3	443000	27000	220000	78500	101000	207000	233000	37900	109000
TAN2.69	1	673000	349000	507000	401000	646000	604000	743000	269000	664000
	2	449000	289000	335000	376000	486000	420000	548000	225000	487000
	3	519000	391000	437000	451000	484000	656000	631000	242000	503000
BG505	1	1980000	18800	15000	15000	15000	425000	540000	113000	311000
	2	1180000	15000	15000	15000	15000	274000	357000	40500	202000
	3	1440000	46300	15000	15000	15000	409000	457000	29300	169000
CH040	1	1930000	1130000	204000	145000	219000	1100000	1210000	352000	1030000
	2	1490000	879000	160000	126000	211000	785000	963000	231000	809000
	3	1550000	863000	137000	140000	160000	920000	896000	175000	642000
CAP210	1	2100000	81800	15000	15000	15000	159000	196000	22500	78500
	2	1430000	60000	15000	15000	15000	102000	112000	15000	51400
	3	1590000	64300	15000	15000	15000	137000	141000	15000	33400
QB587	1	1900000	64500	15000	15000	15000	68500	68500	15000	78500
	2	1580000	59000	15000	15000	15000	60800	76300	15000	56000
	3	1730000	69500	15000	15000	15000	82000	81800	15000	43900
YBF106	1	3090000	222000	253000	267000	436000	241000	330000	15000	42800
	2	2740000	139000	213000	166000	271000	161000	269000	15000	38300
	3	2200000	192000	187000	176000	280000	174000	232000	15000	40900
