# Supplementary material for: Adaptation of CD4 in gorillas and chimpanzees conveyed resistance to simian immunodeficiency viruses
Source: eLife. 2025 May 14;13:RP93316. doi: 10.7554/eLife.93316 (PMC12077880; doi:10.7554/eLife.93316)
Supplement: Figure 5—source data 1. [file elife-93316-fig5-data1.xlsx]

## Sheet: Sheet1
	Fig 5A
	envelope	replicate	Gor2	Gor3
	Tan1.910	mean 1	8.3	2.395
		mean 2	8.415	1.91
	Fig 5B
		MB897		EK505		MT145		Tan1.910
	replicate	wt	T15N	wt	T15N	wt	T15N	wt	T15N
	mean 1	15.25	0.94	12	2.79	10.4	6.07	13.25	5.035
	mean 2	18.6	1.22	13.25	2.695	7.37	5.62	9.455	4.585
	Fig 5D
	human residue 27 to gorilla
		MB897			EK505			MT145			Tan1.910
	replicate	wt	H27N	H27R	wt	H27N	H27R	wt	H27N	H27R	wt	H27N	H27R
	mean 1	15.25	2.35	0	12	10	8.87	10.4	6.855	8.35	13.25	1.48	4.13
	mean 2	18.6	2.47	0	13.25	9.875	8.01	7.37	7.09	7.555	9.455	1.365	3.79
	human residue 31 to gorilla
		MB897		EK505		MT145		Tan1.910
	replicate	wt	S31P	wt	S31P	wt	S31P	wt	S31P
	mean 1	15.25	5.08	12	1.9	10.4	5.08	13.25	7.07
	mean 2	18.6	5.51	13.25	2.075	7.37	6.23	9.455	9.1
	human residue 34 to gorilla
		MB897			EK505			MT145			Tan1.910
	replicate	wt	I43M	I34R	wt	I43M	I34R	wt	I43M	I34R	wt	I43M	I34R
	mean 1	15.25	18.1	5.02	12	12.3	2.01	10.4	3.64	2.17	13.25	7.81	9.04
	mean 2	18.6	18.65	5.5	13.25	11.35	1.875	7.37	3.96	2.195	9.455	9.51	11.1
	Fig 5E
	gorilla residue 27 to human
		MB897		EK505		MT145		Tan1.910
	replicate	wt	N27H	wt	N27H	wt	N27H	wt	N27H
	mean 1	0.14	0.37	0.16	0.04	0.59	0.92	0.975	7.7
	mean 2	0.14	0.445	0.16	0.053	0.47	0.85	0.8	7.865
	gorilla residue 31 to human
		MB897		EK505		MT145		Tan1.910
	replicate	wt	P31S	wt	P31S	wt	P31S	wt	P31S
	mean 1	0.23	3.21	0.08	2.15	0.31	1.27	1.275	6.04
	mean 2	0.265	3.925	0.103	2.705	0.205	1.325	1.24	6.31
	gorilla residue 34 to human
		MB897		EK505		MT145		Tan1.910
	replicate	wt	R34M	wt	R34M	wt	R34M	wt	R34M
	mean 1	0.14	0.48	0.16	3.39	0.59	0.84	0.975	0.36
	mean 2	0.14	0.5	0.16	3.73	0.47	0.74	0.8	0.495
