# Supplementary material for: Adaptation of CD4 in gorillas and chimpanzees conveyed resistance to simian immunodeficiency viruses
Source: eLife. 2025 May 14;13:RP93316. doi: 10.7554/eLife.93316 (PMC12077880; doi:10.7554/eLife.93316)
Supplement: Figure 6—figure supplement 1—source data 1. [file elife-93316-fig6-figsupp1-data1.xlsx]

## Sheet: Sheet1
	Figure 6 pi
		Non-Synonimous, Endemically SIV infected species					Non-Synonimous, Uninfected species
		locus	CHIMP	GORILLA			locus	HUMAN	BONOBO	oragutan - PA	oragutan - PP
		znf384	0.00018	0			znf384	0	0.00037	0.00046	0
		PIANP	0	0.0001			PIANP	0	0	0.00041	0.00062
		COPS7A	0	0			COPS7A	3e-05	0	0	0
		MLF2	0.00027	6e-05			MLF2	3e-05	0	0	0
		PTMS	0.00064	0.00026			PTMS	0	0	0	0
		CD4	0.00104	0.00149			CD4	0.00013	0.00051	0.00051	0
		gpr162	0.00028	0.00064			gpr162	0.00017	0.00109	0.00027	0.00027
		GNB3	0	0			GNB3	0.0001	0	0.00026	0.0006
		CDCA3	0.00026	0			CDCA3	3e-05	0	0	0
		TPI1	6e-05	0.00038			TPI1	0	0	0	0
		LRRC23	0.0002	0.0002			LRRC23	0.00096	0	0.00116	0.00025
		ENO2	0.00012	0.0009			ENO2	0	0.00023	0.0002	0
		Synonimous, Endemically SIV infected species					Synonimous, Uninfected species
		locus	CHIMP	GORILLA			locus	HUMAN	BONOBO	oragutan - PA	oragutan - PP
		znf384	0.00384	0.00351			znf384	0.00037	0.00059	0.00301	0.00245
		PIANP	0.00115	0.0008			PIANP	0	0.00064	0.00287	0.0016
		COPS7A	0	0.0003			COPS7A	0.00084	0.0007	0	0
		MLF2	0.00174	0.00262			MLF2	0.00131	0.00048	0	0
		PTMS	0.00229	0.00771			PTMS	0.0003	0.00561	0	0.00304
		CD4	0.00174	0.00374			CD4	0.00281	0.00065	0	0.00062
		gpr162	0.00086	0.00485			gpr162	0.00202	0.00241	0.00086	0.00143
		GNB3	0.00016	0.00271			GNB3	0.00219	0.00032	0	0.00248
		CDCA3	0.00117	0.00262			CDCA3	0	0.00042	0	0
		TPI1	0.00013	0.00062			TPI1	0.00207	0	0	0
		LRRC23	0.00082	0.00038			LRRC23	0.00046	0.0017	0.00082	0.00219
		ENO2	0.0024	0.00099			ENO2	0	0.00048	0.00424	0
	Figure 6 suplement, theta
		Non-Synonimous, Endemically SIV infected species					Non-Synonimous, Uninfected species
		locus	CHIMP	GORILLA			locus	HUMAN	BONOBO	oragutan - PA	oragutan - PP
		znf384	0.0002	0			znf384	0	0.00018	0.0004863	0
		PIANP	0	0.0007			PIANP	0	0	0.00063	0.00116
		COPS7A	0	0			COPS7A	0.00031	0	0	0
		MLF2	0.00078	0.00037			MLF2	0.00034	0	0	0
		PTMS	0.00181	0.00173			PTMS	0	0	0	0
		CD4	0.00085	0.00122			CD4	0.00055	0.0005	0.00034	0
		gpr162	0.0006	0.00066			gpr162	0.0003	0.00101	0.00027	0.00027
		GNB3	0	0			GNB3	0.00049	0	0.00045	0.00045
		CDCA3	0.00148	0			CDCA3	0.00032	0	0	0
		TPI1	0.00023	0.00098			TPI1	0	0	0	0
		LRRC23	0.00085	0.00054			LRRC23	0.00073	0	0.0009	0.00045
		ENO2	0.00023	0.00043			ENO2	0	0.00053	0.00036	0
		Synonimous, Endemically SIV infected species					Synonimous, Uninfected species
		locus	CHIMP	GORILLA			locus	HUMAN	BONOBO	oragutan - PA	oragutan - PP
		znf384	0.0048	0.00345			znf384	0.00105	0.00113	0.00288	0.00285
		PIANP	0.00295	0.0036			PIANP	0	0.00222	0.0049	0.00299
		COPS7A	0	0.00102			COPS7A	0.00092	0.00125	0	0
		MLF2	0.00513	0.0073			MLF2	0.00219	0.00154	0	0
		PTMS	0.00339	0.00323			PTMS	0.00296	0.00398	0	0.00537
		CD4	0.00206	0.00394			CD4	0.00236	0.00081	0	0.0011
		gpr162	0.00208	0.00501			gpr162	0.00205	0.00392	0.00151	0.00151
		GNB3	0.00092	0.00351			GNB3	0.00158	0.00108	0	0.00438
		CDCA3	0.00557	0.00427			CDCA3	0	0.00134	0	0
		TPI1	0.00073	0.00207			TPI1	0.00372	0	0	0
		LRRC23	0.00278	0.00088			LRRC23	0.00159	0.00109	0.00145	0.00145
		ENO2	0.00279	0.00199			ENO2	0	0.00164	0.00332	0
